# Supplementary material
Source: PubMed Central journal article supplement (PMC3086461)
Supplement: NIHMS260372-supplement-1_si_001.pdf [file NIHMS260372-supplement-1_si_001.pdf]

**Title:** Peptide signaling in the Staphylococci

**Authors:** Matthew Thoendel, Jeffrey S. Kavanaugh, Caralyn E. Flack, and Alexander R. Horswill\*

## **Table of Contents**

### **1. Introduction**

### **2. Overview of *agr***

- 2.1. Molecular arrangement of the *agr* locus
- 2.2. *agr* regulon
- 2.3. AIP signal
- 2.4. *agr* interference
- 2.5. AIP structure-activity relationships

### **3. AIP production**

- 3.1. AgrD
- 3.2. AgrB
- 3.3. Mechanism of processing
- 3.4. Type-specific processing

### **4. AgrC**

- 4.1. Structural homology of AgrC family members
- 4.2. Structural features of HPK<sub>10</sub> cytoplasmic domains
- 4.3. Atypical topology of HPK<sub>10</sub> sensory domains
- 4.4. Ligand specificity determinants
- 4.5. Constitutive mutations
- 4.6. Symmetric transmembrane signal transduction

### **5. AgrA**

- 5.1. P2/P3 and PSM promoter binding
- 5.2. Structural studies

### **6. RNAIII**

- 6.1. Structure
- 6.2. Delta-toxin
- 6.3. Mechanism of action
- 6.4. Positive regulation of alpha-toxin
- 6.5. Negative regulation of Protein A
- 6.6. Negative regulation of Rot
- 6.7. Regulation of other targets

### **7. Regulation of *agr***

- 7.1. Environmental cues
- 7.2. Positive regulation
- 7.3. Negative regulation
- 7.4. Other regulators that affect *agr* function

- 8. Interconnection of *agr* and biofilms**
  - 8.1. Effect of *agr* mutations on biofilms
  - 8.2. Biofilm dispersal with *agr* activation
- 9. Role of *agr* in *S. aureus* pathogenesis**
  - 9.1. Community-associated MRSA
  - 9.2. Neutrophils and macrophage interactions
  - 9.3. Animal models of infection
  - 9.4. Association with diseases and colonization
  - 9.5. *agr* variation across strains
- 10. Mechanisms of *agr* inhibition**
  - 10.1. Host factors that inhibit *agr*
  - 10.2. AgrC receptor antagonists
  - 10.3. Other strategies of *agr* inhibition
- 11. *Staphylococcus epidermidis***
  - 11.1. *S. epidermidis* *agr* system
  - 11.2. AIP structure
  - 11.3. *agr* interference
  - 11.4. *agr* regulation of biofilms
- 12. Other Staphylococci**
- 13. Conclusions and future perspectives**

Panel A.

|         |   | TRANSMEMBRANE SENSOR DOMAIN   |            |       |                        |                  |                    |                   |    |                         |                         |            |    |                          |  |  |            |  |  |  |  |       |
|---------|---|-------------------------------|------------|-------|------------------------|------------------|--------------------|-------------------|----|-------------------------|-------------------------|------------|----|--------------------------|--|--|------------|--|--|--|--|-------|
| residue |   | 1234567890                    |            |       |                        |                  | 1234567890         |                   |    |                         |                         | 1234567890 |    |                          |  |  | 1234567890 |  |  |  |  | count |
|         |   | TM1                           |            |       |                        |                  | OUTSIDE            |                   |    |                         |                         | TM2        |    |                          |  |  | INSIDE     |  |  |  |  |       |
| AgrC1   | 1 | ---VELLNSYNFVLFVLTQMILMFT---  | IPAIISGI   | --KYS | KL                     | YDFYFIIVISTLSL   | --FLFK             | MFDSASLIILTSFII   | -I | 68                      | <i>S. aureus</i>        |            |    |                          |  |  |            |  |  |  |  |       |
| AgrC4   | 1 | ---VESLNSYNFVLFVLTQIIIMFT---  | VPSIISGI   | --KYS | KSDYLYITGITALS         | --ILFN           | FIDSVTLIILTIFII    | -I                | 68 | <i>S. aureus</i>        |                         |            |    |                          |  |  |            |  |  |  |  |       |
| AgrC3   | 1 | ---MEALNDYNYVLFVIVQVSLMFF---  | ISAFISGI   | --RYK | KSDYIYIIGIVLSSV        | --YFFD           | KIGSISLVVITIFII    | -I                | 68 | <i>S. aureus</i>        |                         |            |    |                          |  |  |            |  |  |  |  |       |
| AgrC2   | 1 | ---VAYGNKQ-LSYGTFLQVILFT---   | VAKFISFV   | --KF  | NLRDYFIIVGIIPTM        | --FLYY           | FYGSRAVLIPTFSSI    | -I                | 67 | <i>S. aureus</i>        |                         |            |    |                          |  |  |            |  |  |  |  |       |
| AgrC    | 1 | -----MDDINLFPFAGLQIFLMIW---   | VTKVIINM   | --KF  | NFRDYIIVFTIVIPSA       | --IMYY           | FWQSKALIVLVIIIT    | -I                | 65 | <i>S. epidermidis</i>   |                         |            |    |                          |  |  |            |  |  |  |  |       |
| VirS    | 1 | MLMNQMFWDFMENASMIIEVVSFYLI-   | ISQFSPKK   | -RKN  | KQEVYSFVIIIFSILLKVLNV  | --YPNER          | IVICFFIGL          | -I                | 74 | <i>C. perfringens</i>   |                         |            |    |                          |  |  |            |  |  |  |  |       |
| AgrC    | 1 | -----MFSILMAIIQITGIFI---      | AIQILTNK   | --VF  | SIKEGLVTIAIAMLAF       | --PLFT           | LVQYWSMIFVIVFV     | -S                | 62 | <i>L. monocytogenes</i> |                         |            |    |                          |  |  |            |  |  |  |  |       |
| FsrC    | 1 | -----MILSLLATNVLLVSSFIVFV---  | LRVTLIKI   | --E   | KIPLLSLLIVINLCSFAALMLG | --YSW            | LIYALTVVIFTG       |                   | 68 | <i>E. faecalis</i>      |                         |            |    |                          |  |  |            |  |  |  |  |       |
| PltK    | 1 | -----MLVF---                  | LLQILINREL | RQ    | KRVYATVAVMTVLLTV       | --IYM            | LYDDYSDIITFIVNMGL  |                   | 52 | <i>L. plantarum</i>     |                         |            |    |                          |  |  |            |  |  |  |  |       |
| hpk9    | 1 | ---MIGFREYVTVRIAIIWLSLVIITMSL | GEVASNLW   | P     | VP                     | PLAYFWIIPIVCVTTF | --MSS              | RLLYTQWILMLPVAIFL | -- | 73                      | <i>L. plantarum</i>     |            |    |                          |  |  |            |  |  |  |  |       |
| hpk10   | 1 | -----MKIIFVQTLFLFL---         | FVKVLLRDWR | VLS   | IWDISYAVVSSLVSG        | --WIFS           | VIGQYALPLLGLVV     | -L                | 61 | <i>L. plantarum</i>     |                         |            |    |                          |  |  |            |  |  |  |  |       |
| LamC    | 1 | -----MLIIFLQEFFLV---          | ITKAILKK   | -RS   | IQLFDISFVAVSLGVTY      | --AFYS           | LLQDRVSFLVLLCI     | -I                | 60 | <i>L. plantarum</i>     |                         |            |    |                          |  |  |            |  |  |  |  |       |
| PlsK    | 1 | -----MVDFLNIIVVQVTSLLL---     | IYHRISSI   | --K   | LTMREIALVFLGTFSS       | --ILL            | STFFFVAVVIMMLTAIGI | -K                | 63 | <i>L. plantarum</i>     |                         |            |    |                          |  |  |            |  |  |  |  |       |
| PlnB    | 1 | ---MVEISIFDSVIQSFFIYLGIIIL--- | VYNFIFSN   | -T    | NIKRIIYSLILLVLSLVGAIL  | D---             | DTTSLILV---        | -L                | 63 | <i>L. plantarum</i>     |                         |            |    |                          |  |  |            |  |  |  |  |       |
| SppK    | 1 | ---MLYTDVSVSMLQNFVAILLIFL---  | LYRYIQRK   | -I    | TFKRIILDILIAIFS        | ----             | ILYL               | FISDASLLVMVLMRL   | -- | 66                      | <i>L. sakei</i>         |            |    |                          |  |  |            |  |  |  |  |       |
| ComD1   | 1 | -----MDLFGFGTVIVHFLIISH---    | SYHFICKG   | --Q   | INRKELFVFGAYTLTE       | --IV             | ---                | FDFPLYILYLDGLGI   | -E | 62                      | <i>S. pneumoniae R6</i> |            |    |                          |  |  |            |  |  |  |  |       |
| ComD2   | 1 |                               | L          |       | RL                     | R                | Y                  |                   | LE | SF                      | L                       | KI         | 62 | <i>S. pneumoniae A66</i> |  |  |            |  |  |  |  |       |

Panel B.

|         |    | TRANSMEMBRANE SENSOR DOMAIN |        |        |                   |               |            |          |                               |                 |                  |            |     |                         |      |             |            |                         |  |  |  |       |
|---------|----|-----------------------------|--------|--------|-------------------|---------------|------------|----------|-------------------------------|-----------------|------------------|------------|-----|-------------------------|------|-------------|------------|-------------------------|--|--|--|-------|
| residue |    | 1234567890                  |        |        |                   |               | 1234567890 |          |                               |                 |                  | 1234567890 |     |                         |      |             | 1234567890 |                         |  |  |  | count |
|         |    | INSIDE                      |        |        |                   |               | TM3        |          |                               |                 |                  | OUTSIDE    |     |                         |      |             | TM4        |                         |  |  |  |       |
| AgrC1   | 69 | MYFVKIKWYSILLIMTSQI         | -----  | ILYCAN | MYIVI             | -YAYIT        | ---        | KI       | SDSIFVIFP                     | --SFF           | VVYVTISILFSYIIN  |            | 133 | <i>S. aureus</i>        |      |             |            |                         |  |  |  |       |
| AgrC4   | 69 | LYFSKIKWYSILLIMTSQI         | -----  | ILYCAN | MYIVI             | -FTYIV        | ---        | KI       | VDSIFVIFP                     | --IFF           | VVYVTISILFSYIIN  |            | 133 | <i>S. aureus</i>        |      |             |            |                         |  |  |  |       |
| AgrC3   | 69 | FLYFKIRLYSVFLVMVTQI         | -----  | ILYCAN | FVYIII            | -FSYII        | ---        | T        | ISHSVFIVLP                    | --IFL           | VVYSISYALAYILN   |            | 133 | <i>S. aureus</i>        |      |             |            |                         |  |  |  |       |
| AgrC2   | 68 | FLFFKLKYAIVTILVTMI          | -----  | IMYLS  | NFATVGL           | -FLTLR        | ---        | KY       | TTDPAILLP                     | --LY            | ILSFSSVSLLATYLV  | R          | 132 | <i>S. aureus</i>        |      |             |            |                         |  |  |  |       |
| AgrC    | 66 | FFYTKIKLYSILVVLFTTM         | -----  | ILYIT  | NFITVYI           | -HLTIK        | ---        | DY       | IPFKFALQL                     | --IH            | FTSFVITLIIAYLTQ  |            | 130 | <i>S. epidermidis</i>   |      |             |            |                         |  |  |  |       |
| VirS    | 75 | YKFNFRVNNIKCIMISLIF         | -----  | WLFML  | TVEALSISFIVKINSL  | --VNV         | SELLGKN    | -IYR     | METMILSKVILISLI               |                 |                  |            | 143 | <i>C. perfringens</i>   |      |             |            |                         |  |  |  |       |
| AgrC    | 63 | ALYWKKNVVSASITLVV           | -----  | IILL   | TISDSIVG          | -FILV         | PGLNF      | KY       | DEIFNELLPTLIYCAGMLANLLVFSFLLR |                 |                  |            | 133 | <i>L. monocytogenes</i> |      |             |            |                         |  |  |  |       |
| FsrC    | 69 | FLLIHKKRFSIFKAIFLSVF        | -----  | TLLM   | SFINYTEQTILSVFFQ  | -IY           | QNKLLWIASN | ---      | VLLLL                         | INIWIWALKIPN    |                  |            | 138 | <i>E. faecalis</i>      |      |             |            |                         |  |  |  |       |
| PltK    | 53 | LAFVRRKKYFIVTSLTATLA        | -----  | YIL    | SFFGN             | YATESIFHLFNLG | --LND      | WSGWLFEA | --IG                          | ETIVTACMLAVAASF |                  |            | 122 | <i>L. plantarum</i>     |      |             |            |                         |  |  |  |       |
| hpk9    | 74 | -NALKRLVGAIMGVIKAVA         | -QSASP | MLLRQA | IGLHSTA           | -----         | DIN        | FLASI    | ----                          | MML             | PVILGMLAH        |            | 133 | <i>L. plantarum</i>     |      |             |            |                         |  |  |  |       |
| hpk10   | 62 | FTWWHTHSFSESLFVSLQV         | -----  | IIS    | IVVDHISS          | -LLTYM        | ---        | LK       | DD                            | -GY             | LLIFMGLQLVGLITLN |            | 120 | <i>L. plantarum</i>     |      |             |            |                         |  |  |  |       |
| LamC    | 61 | YAYWYEHNISKSVIIAMEI         | -----  | TML    | SMVADHLAS         | -LVMLF        | ---        | FDS      | MR                            | -LY             | LLLFSIFQSLIIMVY  |            | 119 | <i>L. plantarum</i>     |      |             |            |                         |  |  |  |       |
| PlsK    | 64 | D-----GLHQ-----             | KKY    | ---    | LAFYS             | VYSVTF        | FFSLVGN    | -LS      | LLGTF                         | -VD             | GENI             | ----       | YI  | PIFF                    | -TAL | PVVINE      | 118        | <i>L. plantarum</i>     |  |  |  |       |
| PlnB    | 64 | GAIIKEKCPKINYHNLNVLMLISS    | Q      | IV     | ILALASYLSRGLYIYLD | D             | KISGL      | -----    | SE                            | -Y              | GDLFIGIEIIVMYIIG |            | 136 | <i>L. plantarum</i>     |      |             |            |                         |  |  |  |       |
| SppK    | 67 | GWHFHQQKENKIKTTDTANLIL      | IIVI   | Q      | LLLAVAGTII        | ISQ           | -FTIS      | I        | IKS                           | D               | FSQNILNNSA       | T          | D   | --IT                    | LLGI | FFAVLFDGLFF | 143        | <i>L. sakei</i>         |  |  |  |       |
| ComD1   | 63 | RFLFPLGLYSYFRWMKQYERDR      | GFLS   | LLL    | SLLYESTHN         | -FLSV         | TFSS       | -IT      | GD                            | NFV             | LQY              | ---        | H   | P                       | FFFV | TVLTYFVTL   | 136        | <i>S. pneumoniae R6</i> |  |  |  |       |



Panel E.

|         |     | CYTOPLASMIC HK DOMAIN                                                              |            |                         |            |            |              |            |            |            |            |            |            |            |            |            |            |            |            |            |       |  |  |
|---------|-----|------------------------------------------------------------------------------------|------------|-------------------------|------------|------------|--------------|------------|------------|------------|------------|------------|------------|------------|------------|------------|------------|------------|------------|------------|-------|--|--|
| residue |     | 1234567890                                                                         | 1234567890 | 1234567890              | 1234567890 | 1234567890 | 1234567890   | 1234567890 | 1234567890 | 1234567890 | 1234567890 | 1234567890 | 1234567890 | 1234567890 | 1234567890 | 1234567890 | 1234567890 | 1234567890 | 1234567890 | 1234567890 | count |  |  |
|         |     | N-BOX                                                                              |            |                         |            |            |              |            |            |            |            |            |            |            |            |            |            |            |            |            |       |  |  |
|         |     | h h N                                                                              |            |                         |            |            |              |            |            |            |            |            |            |            |            |            |            |            |            |            |       |  |  |
| AgrC1   | 276 | QMNAIKLNGIENLKVREIKGLITAKILRAQEMNIPISIEIPDE-VSSINLNMIDLSRSIGIILLDNAIEASTEIDDPIIRV  | 354        | <i>S. aureus</i>        |            |            |              |            |            |            |            |            |            |            |            |            |            |            |            |            |       |  |  |
| AgrC4   | 276 | QMNAIKLNGIENLKVREIKGLITAKILRAQEMSIPIISIEIPDE-VTHINLNMIDLSRSIGIILLDNAIEASTEIDDPIIRV | 354        | <i>S. aureus</i>        |            |            |              |            |            |            |            |            |            |            |            |            |            |            |            |            |       |  |  |
| AgrC3   | 276 | QMNAIKLNGIENLKVREIKGLITAKILRAQEMNIPISIEIPDE-VTRINLNMIDLSRSIGIILLDNAIEASTEIDDPIIRV  | 354        | <i>S. aureus</i>        |            |            |              |            |            |            |            |            |            |            |            |            |            |            |            |            |       |  |  |
| AgrC2   | 275 | QMNAIKLNGIENLKVREIKGLITAKILRAQEMNIPISIEIPDE-VSSINLNMIDLSRSIGIILLDNAIEASTEIDDPIIRV  | 353        | <i>S. aureus</i>        |            |            |              |            |            |            |            |            |            |            |            |            |            |            |            |            |       |  |  |
| AgrC    | 273 | KTRSIKMNGIEKLVREIKGLITTKIIQAQEKRIPIISIEVPDE-IDRIDMNTVELSRIIGIIVDNAIEASENLEEPLINI   | 351        | <i>S. epidermidis</i>   |            |            |              |            |            |            |            |            |            |            |            |            |            |            |            |            |       |  |  |
| VirS    | 282 | NSEIDKLNLFNTGNEVLVDVILNNKREKCMENNISLKVIFIDFS-KVN-FIEYFDICTIFSNCIDNAIEACKKIKDNNRYI  | 359        | <i>C. perfringens</i>   |            |            |              |            |            |            |            |            |            |            |            |            |            |            |            |            |       |  |  |
| AgrC    | 279 | ESNNYKISLLQNIHVIELKGLLAVKLIRAQELKIDAILEVVEP-IDKISMSIDLCKVVGILLDNAIEAALTTCENPVIRI   | 357        | <i>L. monocytogenes</i> |            |            |              |            |            |            |            |            |            |            |            |            |            |            |            |            |       |  |  |
| FsrC    | 282 | DNEEFELMKNLRLKKNMELKALISMKINTAKQAKLKVIVDVPEVFILDTSIDLVVVIRLLAILLDNAIEENSAKSELKMF   | 361        | <i>E. faecalis</i>      |            |            |              |            |            |            |            |            |            |            |            |            |            |            |            |            |       |  |  |
| PltK    | 267 | NRDFGHFDNLEQIKDKPLKAI IQSKFSVARQAGIQVRLEANDP-IAAIAIDSVTLRSVSGILLDNAIEAVKQSGGQIAV   | 345        | <i>L. plantarum</i>     |            |            |              |            |            |            |            |            |            |            |            |            |            |            |            |            |       |  |  |
| hpk9    | 271 | NRQS-GLSDLSRLDMPTVSGLIYAKYEAANGQNVHLVVTILEK-VTLADIPQIKVVRILGNLLDNAIEDAAARANH-QVAL  | 347        | <i>L. plantarum</i>     |            |            |              |            |            |            |            |            |            |            |            |            |            |            |            |            |       |  |  |
| hpk10   | 262 | SDEQYNLEDLSRVQVKSILFVSKLSYAQSQGVKQVFDLQV-LNGVTTNELDLAIALGILLDNAIEATAGHYHGELMS      | 340        | <i>L. plantarum</i>     |            |            |              |            |            |            |            |            |            |            |            |            |            |            |            |            |       |  |  |
| LamC    | 261 | LKEYNLEDLSRVKVKSIKLSILFVSKLSYAQSQIEVHFDLKEP-LIDITVNELDLAIALGIMLDNAIEASVGHADGEIMS   | 339        | <i>L. plantarum</i>     |            |            |              |            |            |            |            |            |            |            |            |            |            |            |            |            |       |  |  |
| PlsK    | 271 | QSSKYSLINLSKLVPAIKSILSSKIIYAQQNGIEVNIIEISSD-VTTTYFDLLDYIRVIAIFLDNAIEASLSTDLPEMSV   | 349        | <i>L. plantarum</i>     |            |            |              |            |            |            |            |            |            |            |            |            |            |            |            |            |       |  |  |
| PlnB    | 288 | SLNDGSIASVQHLKNEILRGLVQKFFYAKQCGVKLTIEIANT-DFILSHGVTVAVRIIGNLLDNAIEQAQKMTDKIVTV    | 366        | <i>L. plantarum</i>     |            |            |              |            |            |            |            |            |            |            |            |            |            |            |            |            |       |  |  |
| SppK    | 294 | EIQGAVIAQLDYLKNDPIRGLVIQKFLAAKQAGVTLKFEMTEP-IELATANLLTVIRIIGILLDNAIEQAVQETDQLVSC   | 372        | <i>L. sakei</i>         |            |            |              |            |            |            |            |            |            |            |            |            |            |            |            |            |       |  |  |
| ComD1   | 285 | RSDKYTYFDLNNIEDSALRSLVAQSIYARNNGVEFTLEVKDT-ITKLPIELLDLVRIMSVLLNNAVEGSADS           | 363        | <i>S. pneumoniae R6</i> |            |            |              |            |            |            |            |            |            |            |            |            |            |            |            |            |       |  |  |
|         |     | DHp Subdomain                                                                      |            |                         |            |            | CA Subdomain |            |            |            |            |            |            |            |            |            |            |            |            |            |       |  |  |

panel F.

|         |     | CYTOPLASMIC HK DOMAIN                                                              |            |                         |            |            |            |            |            |            |            |            |            |            |            |            |            |            |            |            |       |  |  |
|---------|-----|------------------------------------------------------------------------------------|------------|-------------------------|------------|------------|------------|------------|------------|------------|------------|------------|------------|------------|------------|------------|------------|------------|------------|------------|-------|--|--|
| residue |     | 1234567890                                                                         | 1234567890 | 1234567890              | 1234567890 | 1234567890 | 1234567890 | 1234567890 | 1234567890 | 1234567890 | 1234567890 | 1234567890 | 1234567890 | 1234567890 | 1234567890 | 1234567890 | 1234567890 | 1234567890 | 1234567890 | 1234567890 | count |  |  |
|         |     | h G-BOX GhG h h h                                                                  |            |                         |            |            |            |            |            |            |            |            |            |            |            |            |            |            |            |            |       |  |  |
| AgrC1   | 355 | AFIESE-NSVTFIVMNCAD-DIPRIHELFFQESFSTKGE--GRGLGLSTLKEIADNADNVLLDITIENG              | 429        | <i>S. aureus</i>        |            |            |            |            |            |            |            |            |            |            |            |            |            |            |            |            |       |  |  |
| AgrC4   | 355 | AFIESE-NSVTFIVMNCAD-DIPRIHELFFQESFSTKGE--GRGLGLSTLKEIADNADNVLLDITIENG              | 429        | <i>S. aureus</i>        |            |            |            |            |            |            |            |            |            |            |            |            |            |            |            |            |       |  |  |
| AgrC3   | 355 | AFIESE-NSVTFIVMNCAD-DIPRIHELFFQESFSTKGE--GRGLGLSTLKEIADNADNVLLDITIENG              | 429        | <i>S. aureus</i>        |            |            |            |            |            |            |            |            |            |            |            |            |            |            |            |            |       |  |  |
| AgrC2   | 354 | AFIESE-NSVTFIVMNCAD-DIPRIHELFFQESFSTKGE--GRGLGLSTLKEIADNADNVLLDITIENG              | 428        | <i>S. aureus</i>        |            |            |            |            |            |            |            |            |            |            |            |            |            |            |            |            |       |  |  |
| AgrC    | 352 | AFIDNE-ESVTFIVMNCASN-DIPKIHelfEQGFSTKGD--NRGLGLSTLKEITDSNENVLLDITVIENGY-FVQKVEINN  | 426        | <i>S. epidermidis</i>   |            |            |            |            |            |            |            |            |            |            |            |            |            |            |            |            |       |  |  |
| VirS    | 360 | SLKGNVCVNNFYVIKIENSKT-N--KIKKLNDFLTDKDKFLHGIIGLKNIRLALAEKYNGEIIIEPLDDKFIKMLIPINQ   | 436        | <i>C. perfringens</i>   |            |            |            |            |            |            |            |            |            |            |            |            |            |            |            |            |       |  |  |
| AgrC    | 358 | AFVKKG-DSIIIVFANSLPV-NMPPYKIFEEGFSTKGE--GRGLGLASLREIMKKYSHVALDTKVTVDRE-VIQELEIM-   | 431        | <i>L. monocytogenes</i> |            |            |            |            |            |            |            |            |            |            |            |            |            |            |            |            |       |  |  |
| FsrC    | 362 | SIFNKN-ETQEFVITNSVQA--EFDFKVMKTKFSSKSNPEEHGWGLLYVKEIVDFSDQFDLQTSFNEGA-VTQHLLIEK    | 437        | <i>E. faecalis</i>      |            |            |            |            |            |            |            |            |            |            |            |            |            |            |            |            |       |  |  |
| PltK    | 346 | ALVKYP-RMVELIFANSLNH-PIERLDELVMAGHTSKGA--GHGQGLATVRELLDPLANVTYEVSSHQRF---EFIISI    | 417        | <i>L. plantarum</i>     |            |            |            |            |            |            |            |            |            |            |            |            |            |            |            |            |       |  |  |
| hpk9    | 348 | TVKNRDAHTTVFSITNQIPTHEAVDLSVIKKSRTTKPG--HLGYGLSSIEQLT--TDQLVVNYCIEEGN-FIAELIIKH    | 422        | <i>L. plantarum</i>     |            |            |            |            |            |            |            |            |            |            |            |            |            |            |            |            |       |  |  |
| hpk10   | 341 | AIFVTA-HSTVFLVQNNVFD-SLPLWLQKEAGYSTKGG--ERGLGLSLSAIVNRNENMILETRLLASA-FVQRLTVKR     | 415        | <i>L. plantarum</i>     |            |            |            |            |            |            |            |            |            |            |            |            |            |            |            |            |       |  |  |
| LamC    | 340 | AIFIEK-NSTVFLIQNNVFE-QLPLWKLKEAGYSTKGG--NRGIGLNSLSKIVNRNENMILETRVLGAV-FLQRLTVKR    | 414        | <i>L. plantarum</i>     |            |            |            |            |            |            |            |            |            |            |            |            |            |            |            |            |       |  |  |
| PlsK    | 350 | AFIEED-DSQTVIIIVNAPD-SYIDKRRIFESGFSTKGGH--NRGIGLATVKDILNKYPNASLETETFKNSL-FTQKLAIKK | 424        | <i>L. plantarum</i>     |            |            |            |            |            |            |            |            |            |            |            |            |            |            |            |            |       |  |  |
| PlnB    | 367 | AFNEID-NTAEIAISNPI-D-SDFNQHQIFETGYSTKGS--NRGLGLTNVRDLVEQQKGFYMDIETKKNY-VTMTLIVTE   | 440        | <i>L. plantarum</i>     |            |            |            |            |            |            |            |            |            |            |            |            |            |            |            |            |       |  |  |
| SppK    | 373 | AFLQSD-GLIEITIENTA-S-QVKNLQAFSELGYSTKGA--GRGTGLANVQDLIAKQTNLFLETQIENRK-LRQTLMITE   | 446        | <i>L. sakei</i>         |            |            |            |            |            |            |            |            |            |            |            |            |            |            |            |            |       |  |  |
| ComD1   | 364 | AVIKME-TETVIVIQNSCKM-TMTPSGDLFALGFSTKGR--NRGVGLNNVKELLDKYNIIILETEMEGST-FRQIIRFKR   | 438        | <i>S. pneumoniae R6</i> |            |            |            |            |            |            |            |            |            |            |            |            |            |            |            |            |       |  |  |
|         |     | CA Subdomain                                                                       |            |                         |            |            |            |            |            |            |            |            |            |            |            |            |            |            |            |            |       |  |  |

Panel G.

|         |     | HK DOMAIN |   |   |   |   |   |   |   |   |    |       |                         |
|---------|-----|-----------|---|---|---|---|---|---|---|---|----|-------|-------------------------|
| residue |     | 1         | 2 | 3 | 4 | 5 | 6 | 7 | 8 | 9 | 10 | count |                         |
| AgrC1   | 430 | N         | - | - | - | - | - | - | - | - | -  | 430   | <i>S. aureus</i>        |
| AgrC4   | 430 | N         | - | - | - | - | - | - | - | - | -  | 430   | <i>S. aureus</i>        |
| AgrC3   | 430 | N         | - | - | - | - | - | - | - | - | -  | 430   | <i>S. aureus</i>        |
| AgrC2   | 429 | N         | - | - | - | - | - | - | - | - | -  | 429   | <i>S. aureus</i>        |
| AgrC    | 427 | K         | E | S | - | - | - | - | - | - | -  | 429   | <i>S. epidermidis</i>   |
| VirS    | 437 | E         | K | E | A | - | - | - | - | - | -  | 440   | <i>C. perfringens</i>   |
| AgrC    |     | -         | - | - | - | - | - | - | - | - | -  |       | <i>L. monocytogenes</i> |
| FsrC    | 438 | N         | H | N | S | K | K | V | V | N | E  | 447   | <i>E. faecalis</i>      |
| PltK    | 418 | E         | S | E | - | - | - | - | - | - | -  | 420   | <i>L. plantarum</i>     |
| hpk9    |     | -         | - | - | - | - | - | - | - | - | -  |       | <i>L. plantarum</i>     |
| hpk10   | 416 | E         | - | - | - | - | - | - | - | - | -  | 416   | <i>L. plantarum</i>     |
| LamC    | 415 | V         | S | Q | N | D | - | - | - | - | -  | 419   | <i>L. plantarum</i>     |
| PlsK    | 425 | D         | V | - | - | - | - | - | - | - | -  | 426   | <i>L. plantarum</i>     |
| PlnB    | 441 | D         | K | - | - | - | - | - | - | - | -  | 442   | <i>L. plantarum</i>     |
| SppK    | 447 | E         | T | - | - | - | - | - | - | - | -  | 448   | <i>L. sakei</i>         |
| ComD1   | 439 | E         | F | E | - | - | - | - | - | - | -  | 441   | <i>S. pneumoniae R6</i> |

CA Subdomain

**Figure S1.** COBALT generated alignment of AgrC and representative AgrC homologs (HPK<sub>10</sub>'s). Highlighted residue are as follows: gray, residues predicted to be part of trans-membrane helices; red, highly conserved residues; green, residues where mutations lead to constitutive activity; magenta, residues where mutations result in broader ligand specificity; blue, residues predicted to have high propensity for coiled-coil formation. Residues in magenta test have been shown to influence ligand binding specificity. Residues enclosed in boxes have been shown to be located on the outside (black boxes) or inside (red boxes) of the membrane by  $\beta$ -galactosidase (*lacZ*) and/or alkaline phosphatase (*phoA*) fusion analyses. TM5 residues that are part of a four-element leucine zipper motif are shown as bold, underlined red or black text. Boundaries of the transmembrane sensor domain and cytoplasmic HK domain are indicated by the bars at the top of each panel, and boundaries of the DHp and CA subdomains are indicated by the bars at the bottom of the panels. Protein and bacteria names as well as protein specific residue numbering are indicated in the margins, and residue count line is provided at the top of each panel to aid in counting residues.

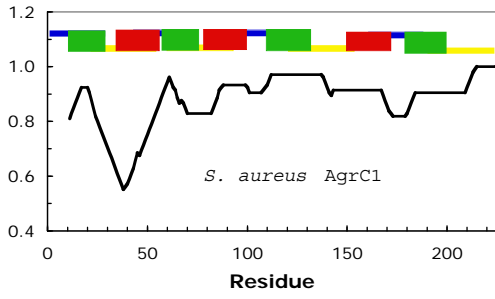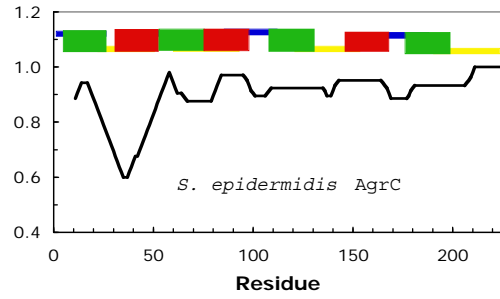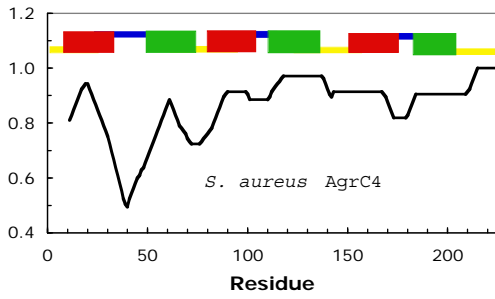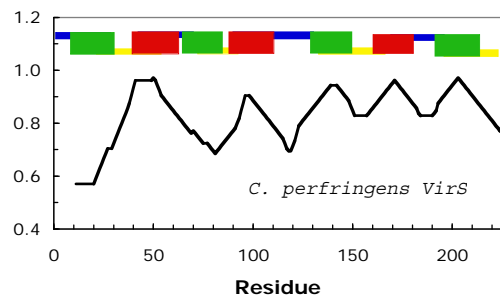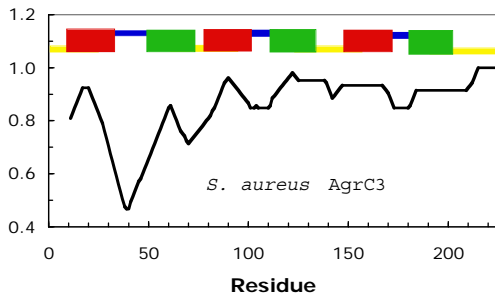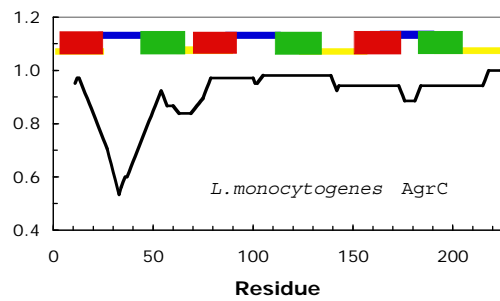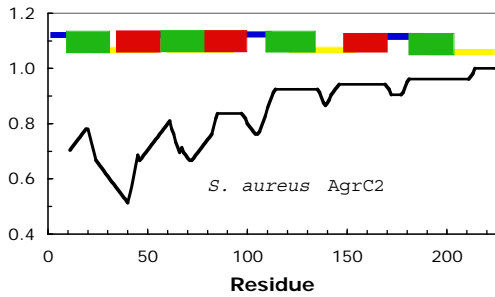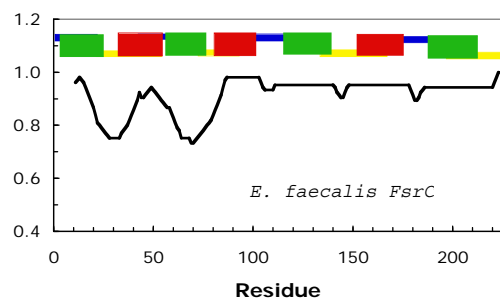

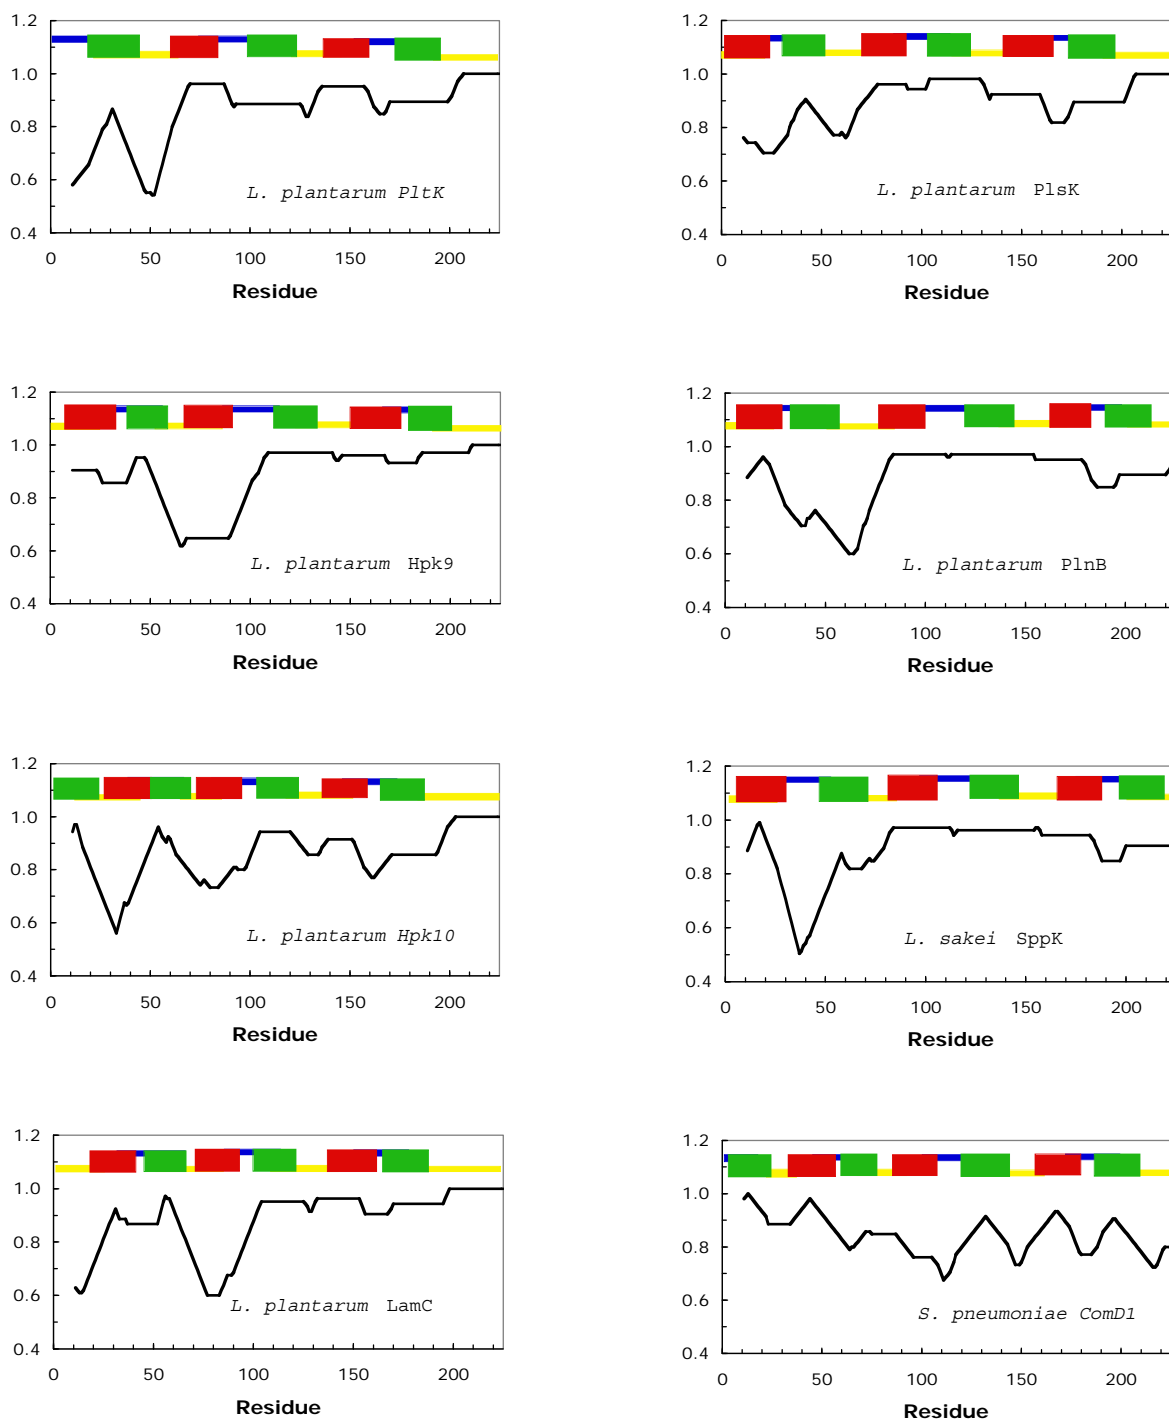

**Figure S2.** TOPCONS consensus topology predictions (outside, thin blue bars; TM<sub>OUT-to-IN</sub>, wide green bars; inside, thin yellow bars; TM<sub>IN-to-OUT</sub>, thick red bars) and reliability plots for the 16 HPK<sub>10</sub> sequences in Figure S1.
